# Supplementary material
Source: PubMed Central journal article supplement (PMC3724613)
Supplement: supp_M113.465120_jbc.M113.465120-1.pdf [file supp_M113.465120_jbc.M113.465120-1.pdf]

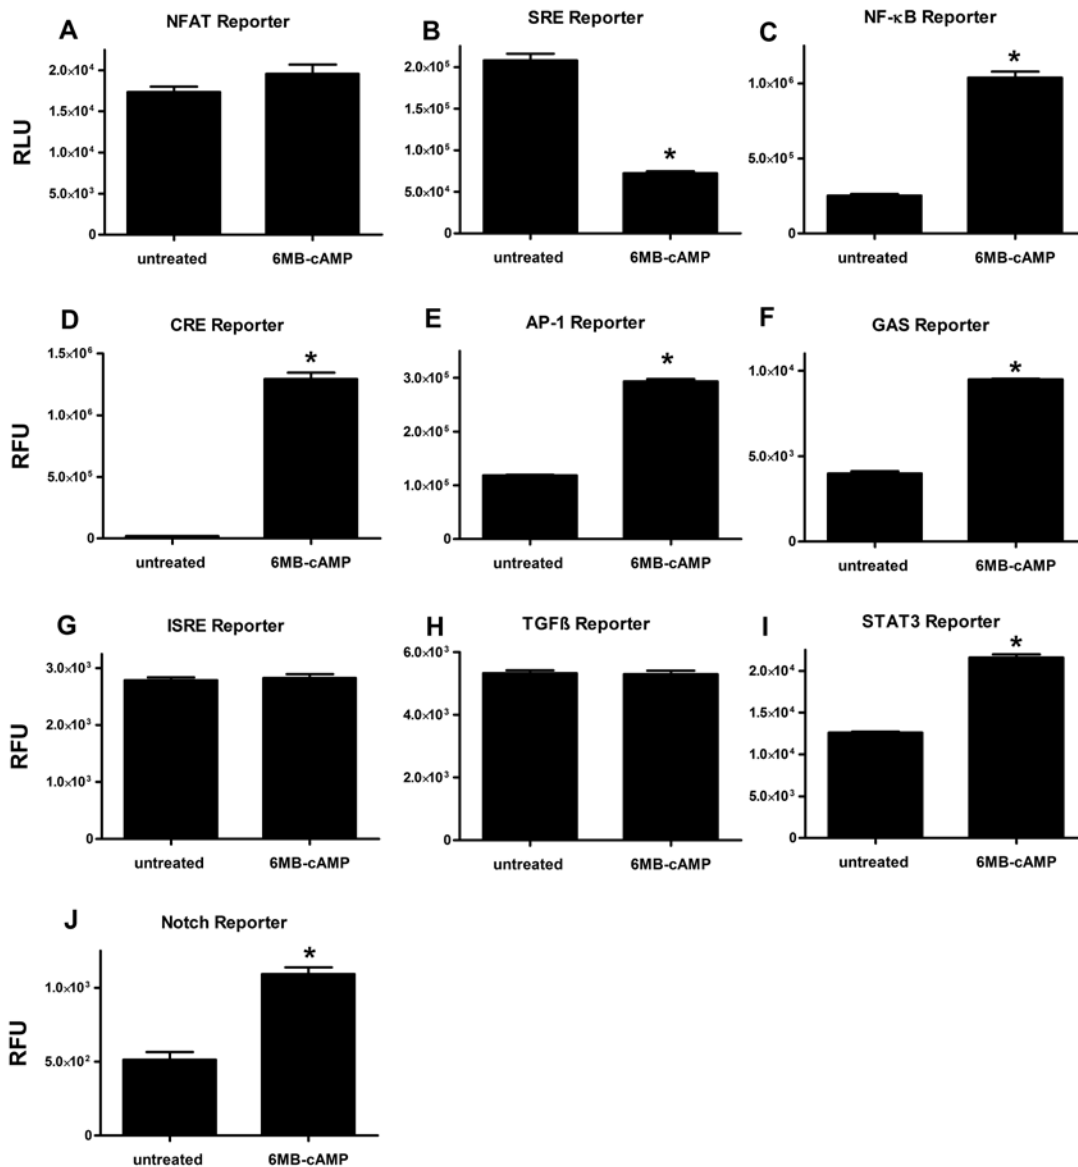

**Figure S1. Gene reporter screen used to identify Notch signaling as a cAMP sensitive pathway in macrophages.** As described in the Experimental Procedures, stable RAW 264.7 cells containing various luciferase gene reporters were generated. The following reporters were examined: Nuclear Factor of Activated T-cells (NFAT); serum response element (SRE); nuclear factor-κB (NF-κB); cAMP response element (CRE); activator protein-1 (AP-1); interferon gamma activation sequence (GAS) response element; interferon stimulated response element (ISRE); transforming growth factor β (TGFβ)/SMAD; STAT3/sis-inducible element (SIE); Notch/RBP-J. Luciferase levels were measured in each of the reporter cell lines exposed to 1 mM 6MB-cAMP for 7 h. The values in these bar graphs represent normalized average relative luciferase units (RLU) from three independent experiments. Error bars indicate +/- SD. \* indicates P < 0.05.
